# Supplementary material
Source: HighWire-hosted journal article supplement (https://heart.bmj.com/content/103/14/1065)
Supplement: inline-supplementary-material-1 [file inline-supplementary-material-1.docx]

**Supplemental Table 1.** Signs and Symptoms of Cardiac Amyloidosis.

| **Test** | **Findings** |
| --- | --- |
| Clinical features | - Heart failure - atypical chest pain, - orthostatic hypotension - syncope |
| Chest Radiography | - Normal heart size or cardiomegaly with pleural effusions, pulmonary congestion |
| Cardiac Biomarkers | - Elevated N-terminal probrain natriuretic peptide - Elevated cardiac troponin T |
| Electrocardiography | - Low QRS voltage common (note: normal voltage or even LVH criteria may be present) - Pseudoinfarct pattern - Arrhythmias - AV block, RBBB, LBBB - Low voltage/mass - Fragmented QRS |
| Echocardiography | - Thickened walls and valves, pericardial effusion - Preserved LV ejection fraction (reduced EF does not exclude diagnosis) - Low voltage/mass - Left ventricular size usually normal or reduced - Doppler shows restricted filling - Reduced LV strain with apical sparing( “bullseye” pattern) |
| MRI and Nuclear Imaging | - Abnormal late gadolinium enhancement and difficulty “nulling” the myocardium - Nuclear scintigraphy (PYP, DPD) for TTR amyloidoisis - MRI imaging using (11C-PIB; 11C-Pittsburgh B compound) and florbetapir to detect AL amyloidosis |
